1 How can digital citizen science approaches improve ethical smartphone use surveillance  
2 among youth: traditional surveys versus ecological momentary assessments.

3

4

5

6 Sarah Al-Akshar<sup>1</sup>, Sheriff Tolulope Ibrahim<sup>1</sup>, Tarun Reddy Katapally<sup>1,2,3\*</sup>

7

8

9

10

11

12

13

14

15

16

17 <sup>1</sup> DEpTh Lab, School of Health Studies, Faculty of Health Sciences, Western  
18 University, London, Ontario, N6A 3K7, Canada; [tarun.katapally@uwo.ca](mailto:tarun.katapally@uwo.ca)  
19 (T.R.K.).

20

21 <sup>2</sup> Department of Epidemiology and Biostatistics, Schulich School of Medicine and Dentistry,  
22 Western University, London, Ontario, N6A 3K7, Canada; [tarun.katapally@uwo.ca](mailto:tarun.katapally@uwo.ca).

23

24 <sup>3</sup> Children's Health Research Institute, Lawson Health Research Institute, 750 Base Line  
25 Road East, Suite 300, London, Ontario, Canada N6C 2R5

26

27

28

29

30

**\*Corresponding author**

31

32

Email: [tarun.katapally@uwo.ca](mailto:tarun.katapally@uwo.ca) (TRK)

33

34

## 35 **Abstract**

### 36 **Background**

37 Ubiquitous use of smartphones among youth poses significant challenges related to non-  
38 communicable diseases, including poor mental health. Although traditional survey measures  
39 can be used to assess smartphone use among youth, they are subject to recall bias. This study  
40 aims to compare self-reported smartphone use via retrospective modified traditional recall  
41 survey and prospective Ecological Momentary Assessments (EMAs) among youth.

### 42 **Methods**

43 This study uses data from the Smart Platform, which engages with youth as citizen scientists.  
44 Youth (N=436) aged 13-21 years in two urban jurisdictions in Canada (Regina and Saskatoon)  
45 engaged with our research team using a custom-built application via their own smartphones to  
46 report on a range of behaviours and outcomes on eight consecutive days. Youth reported  
47 smartphone use utilizing a traditional validated measure, which was modified to capture  
48 retrospective smartphone use on both weekdays and weekend days. In addition, daily EMAs  
49 were also time-triggered over a period of eight days to capture prospective smartphone use.  
50 Demographic, behavioural, and contextual factors were also collected. Data analyses included  
51 t-test and linear regression using SPSS statistical software.

### 52 **Results**

53 There was a significant difference between weekdays, weekends and overall smartphone use  
54 reported retrospectively and prospectively (p-value= <0.001), with youth reporting less  
55 smartphone use via EMAs. Overall retrospective smartphone use was significantly associated  
56 with not having a part-time job ( $\beta=0.342$ , 95%[CI]=0.146-1.038, p-value =0.010) and

57 participating in a school sports team ( $\beta=0.269$ , 95%[CI]= 0.075-0.814, p-value=0.019).  
58 However, prospective smartphone use reported via EMAs was not associated with any  
59 behavioural and contextual factors.

## 60 **Conclusion**

61 The findings of this study have implications for appropriately understanding and monitoring  
62 smartphone use in the digital age among youth. EMAs can potentially minimize recall bias of  
63 smartphone use among youth, and other behaviours. More importantly, digital citizen science  
64 approaches that engage large populations of youth using their own smartphones can transform  
65 how we ethically monitor and mitigate the impact of excessive smartphone use.

## 66 **Keywords**

67 Digital epidemiology, digital health, digital citizen science, ecological momentary  
68 assessments, smartphone use, screentime, youth health

## 69 **Author Summary**

70 Use of ubiquitous digital devices, particularly smartphones, has experienced an exponential  
71 increase among youth, a phenomenon that continues to influence youth health. Although  
72 retrospective measures have been used to understand smartphone use among youth, they are  
73 prone to measurement and compliance biases. There has been a growing interest in using  
74 ecological momentary assessments (EMAs) to assess smartphone use to minimize biases associated  
75 with retrospective measures. This study uses the smart framework, which integrates citizen  
76 science, community based participatory research and systems science to ethically engage with  
77 youth citizen scientists using their own smartphones to understand smartphone use behaviours  
78 – reported by the same cohort of youth using both retrospective and prospective measures. The  
79 findings show a significant difference between smartphone use reported through retrospective  
80 and prospective EMAs, with youth reporting more smartphone use via retrospective measures.  
81 Furthermore, there were differences in contextual and behavioural factors that were associated  
82 with smartphone use reported via retrospective and prospective measures. The findings have  
83 implications for appropriately understanding and monitoring smartphone use in the digital age  
84 among youth. More importantly, digital citizen science approaches that engage large  
85 populations of youth using their own smartphones can transform how we ethically monitor and  
86 mitigate the impact of excessive smartphone use.

87

88

89

90



## 92 **Background**

93           The prevalence of smartphone usage among the younger population has experienced a  
94 significant surge in recent years on a global scale, as evidenced by the fact that 84% of  
95 smartphone users fall within the young adult demographic. [1]. Nonetheless, there is still  
96 ambiguity regarding how youth use their smartphones and the potential implications of using  
97 ubiquitous digital tools such as smartphones [2].

98           In understanding smartphone use among youth, thus far, traditional self-report measures  
99 have been predominantly used [3], which pose issues such as recall bias and measurement  
100 errors [4,5] . Moreover, smartphone use includes a range of activities that encompass  
101 communication, e-learning, entertainment, and social media, among others, which are not  
102 captured by traditional survey measures [5].

103           Advanced population health measurement techniques such as ecological momentary  
104 assessments (EMAs), can potentially address measurement bias and capture the entire range of  
105 smartphone activities [6,7]. EMAs “capture brief, repeated assessments in natural environments  
106 with a high degree of ecological validity relative to laboratory-based investigations” [8]. EMAs  
107 are prospective measures that provide an advantage in assessing behaviours with respect to the  
108 context and the environment of the participants [9]. While traditional surveys are important in  
109 understanding behaviour retrospectively, EMAs have the advantage of minimizing recall bias  
110 and improving the validity of results [10]. Moreover, EMAs reduce the burden of responding  
111 to surveys and improve rates of compliance and feasibility for participants [11], as well as  
112 minimize social desirability bias [12].

113           Although current research examines the screentime of youth, including watching TV  
114 and playing video games, there is a scarcity of evidence focusing on smartphone use [13]. It is  
115 critical to appropriately understand smartphone use among youth to not only inform potential  
116 smartphone use recommendations [14], but also to determine appropriate use for digital health  
117 interventions [15]. In addition, currently no studies exist that compare retrospectively reported  
118 smartphone use using traditional survey measures and prospectively reported smartphone use  
119 using EMAs within the same cohort of youth. The objective of this study is to compare  
120 smartphone use reported via retrospective surveys and prospective EMAs by engaging with  
121 youth citizen scientists via their own smartphones. The study also investigates the demographic,  
122 behavioural, and contextual factors that are associated with smartphone use reported via  
123 retrospective surveys compared to prospective EMAs.

## 124 **Methodology**

### 125 **Study Design**

126           This study is a part of the Smart Platform, which is a citizen science and digital  
127 epidemiological initiative for ethical population health surveillance, knowledge translation, and  
128 real-time interventions [16]. Smart Platform integrates community-based participatory research  
129 and digital citizen science to ethically obtain big data from citizen-owned smartphones[16].  
130 The study uses a combination of cross sectional and temporal longitudinal design [17]. The  
131 Research Ethics Boards at the Universities of Regina and Saskatchewan approved the Smart  
132 Platform's application for research ethics approval (REB # 2017-029).

133           The research team engaged with youth citizen scientists via their smartphones over the  
134 course of eight days through the Smart Platform smartphone custom-built application.  
135 Youth citizen scientists could download the application through the iOS or Android operating

136 systems. [17]. To understand the retrospective smartphone use behaviours, a modified  
137 traditional retrospective recall survey was deployed using a one-time triggered notification on  
138 day one, which also collected demographic characteristics, including gender, age, and  
139 socioeconomic status (**Figure 1**). The retrospective survey investigated the habits of youth  
140 citizen scientists' smartphone use. Later, during a period of eight days, the app triggered daily  
141 EMAs to capture prospective smartphone use including weekdays and weekends (**Figure 1**).  
142 In addition, youth citizen scientists reported on their school environment, including available  
143 facilities and resources at their school, as well as the level of family and friends' involvement  
144 and encouragement to perform physical activities[18].

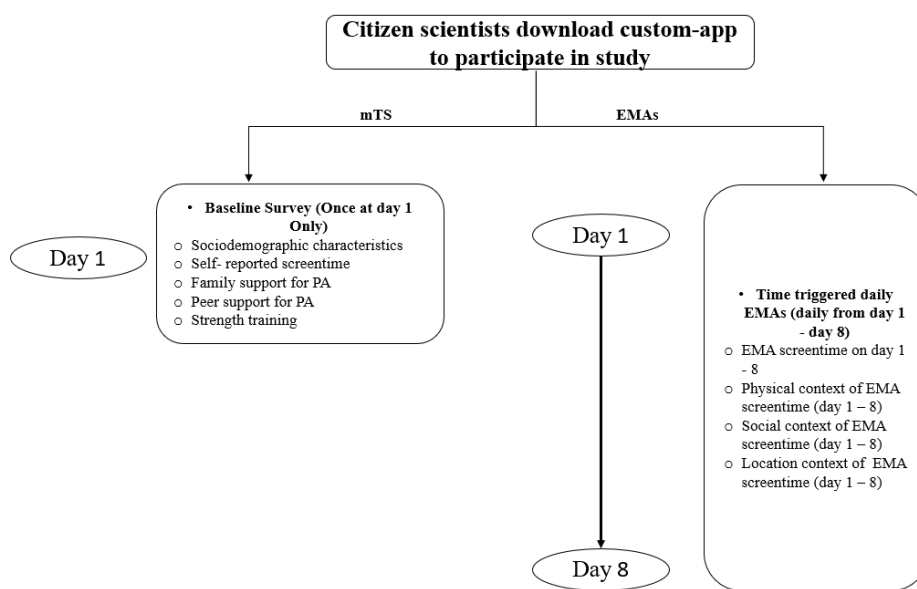

145  
146 Figure 1: Deployment structure of prosepective and retrospective surveys

147

148



## 149 **Participants**

150 To achieve 90% confidence level and a 5% margin of error, a sample size calculation  
151 resulted in the sample size to be at least 161. Regina Public and Catholic School Boards were  
152 contacted for recruitment of youth citizen scientists, and in-person recruitment sessions were  
153 initiated August 31<sup>st</sup>, 2018, until December 31<sup>st</sup> of the same year. As a result, a total of 808  
154 youth citizen scientists were recruited from five schools (aged 13-21). During the recruitment  
155 sessions, researchers demonstrated how to use the smartphone application, youth citizen  
156 scientists were able to download and join the study anytime during the recruitment period  
157 (August 31<sup>st</sup> -December 31<sup>st</sup>, 2018). Informed consent was provided to all youth citizen  
158 scientists through the application. However, youth citizen scientists between the ages of 13-16  
159 years were required to provide implied inform consent obtained from either their caregiver(s)  
160 or parent(s) before the scheduled recruitment sessions [18].

## 161 **Measures**

### 162 **Smartphone Use (dependent variables)**

163 Dependent variables were mean on weekdays, weekends, and overall retrospective and  
164 prospective (EMAs) smartphone use per day. The retrospective survey questions were deployed  
165 on day one of engagement via a custom-built application, while EMAs were deployed daily  
166 (8:00 pm-11:30 pm) and were set to expire by 12:00 am.

167 The 9-questions Sedentary Behaviour Questionnaire Survey questions, which is a  
168 retrospective traditional data collection tool, was modified to enable the questions to be  
169 digitally deployed on citizen scientists smartphones [17]. The retrospective modified survey  
170 asked questions such as: “On a typical weekday during the school year, how much time do you  
171 spend on your smartphone for internet surfing (e.g., Facebook, Snapchat, Instagram, YouTube,

172 Reddit, reading news, etc.)?”. From youth responses, weekday mean minutes of retrospective  
173 smartphone use was derived. Further the retrospective survey asked: “On a typical weekend  
174 during the school year, how much time do you spend on your smartphone for internet surfing  
175 (e.g., Facebook, Snapchat, Instagram, YouTube, Reddit, reading news, etc.)?”. From youth  
176 responses, weekend mean minutes of retrospective smartphone use was derived. The sum of  
177 mean weekday and weekend smartphone use was derived and averaged to obtain overall  
178 retrospective smartphone use.

179 To ascertain prospective smartphone use, EMA questions asked: “Which of the  
180 following did you do yesterday?” With response options to include: “Watched television”,  
181 “Internet surfing using desktop/laptop/gaming device/television screen”, “Used smartphone for  
182 internet surfing”, “Texted using a phone”, “Played games on smartphones”, “Listened to  
183 musing while sitting”, “Played a musical instrument while sitting”, “Did arts and crafts while  
184 sitting”, and “Drove or sat in a car/bus.” , “How many minutes did you spend doing this  
185 activity?”, and “With whom did you do this activity?” From these responses, weekend mean  
186 minutes of prospective smartphone use was derived. To derive overall smartphone use  
187 prospectively, a sum of weekday mean minutes of prospective smartphone use and weekend  
188 mean minutes of prospective smartphone use was derived and averaged. Both retrospective and  
189 prospective overall, weekday, and weekend mean minutes of smartphone use were the primary  
190 dependent variables of this study.

### 191 **School PA environment (independent variable)**

192 To capture School PA environment, the following question was asked: “Do you  
193 participate in competitive school sports teams that compete against other schools (e.g., junior  
194 varsity or varsity sports)?”, with the three response options being: “Yes”, “No” or “None

195 offered”. Responses were dichotomized into “Disagree”, corresponding to the response options  
196 “No” or “None offered”, and “Agree”, corresponding to the response option “Yes”.

### 197 **Physical Activity Strength training (independent variable)**

198 The retrospective survey captured strength training using the question: “On how many  
199 days in the last 7 days did you do exercise to strengthen or tone your muscles (e.g., push-ups,  
200 sit-ups, or weight-training)?” with the eight response options being: “0 days,” “1”, “2”, “3”,  
201 “4”, “5”, “6”, or “7 days”. The responses were recoded to “less than four days”, and “four days  
202 or more”. Another question deployed to capture physical activity was “how many minutes did  
203 you spend performing moderate to vigorous physical activity on each day of the week?”.

### 204 **Social support for PA (independent variables)**

205 Social support for physical activity included family and friends’ support. To capture  
206 family involvement with physical activities, the following questions were asked. “How much  
207 do your parents, stepparents, or guardians encourage you to be physically active?” with the five  
208 response options being: “Strongly encourage”, “Encourage”, “Do not encourage nor  
209 discourage”, “Discourage”, or “Strongly discourage”. Responses were dichotomized into  
210 “Discourage/neutral”, which combined the response options “Do not encourage nor  
211 discourage”, “Discourage”, or “Strongly discourage”, and “Encourage”, which included the  
212 response options “Strongly encourage”, or “Encourage”. Finally, youth were asked: “How  
213 much do your parents, stepparents, or guardians support you in being physically active (e.g.,  
214 driving you to team games, buying you sporting equipment)?” with the four response options  
215 being: “Very supportive”, “Supportive”, “Unsupportive”, or “Very unsupportive”. Responses  
216 were dichotomized as “Unsupportive/Neutral”, which combined the response options

217 “Unsupportive” and “Very unsupportive”, and “supportive”, which included the response  
218 options “Very supportive” and “Supportive”.

219 Peer support for PA was captured by asking youth to think about their friends during  
220 the past 12 months when providing answer to this question: “How many of your closest friends  
221 are physically active?” with the six response options being: “None of my friends”, “1”, “2”,  
222 “3”, “4”, or “5 of my friends.” Responses were dichotomized as “Three or less of my friends”,  
223 corresponding to the response option “None of my friends”, “1”, “2”, “3 of my friends” and  
224 “Four or more of my friends”, corresponding to “4”, or “5 of my friends.”

## 225 **Socio-demographic Covariates**

226 The survey asked demographic questions that included parent education level, identity,  
227 gender, and age. Question deployed to collect information about parent education level was:  
228 “what is the highest education level for your parents?”. Responses were: “elementary”, “high  
229 school diploma”, “college”, “university”. Responses were recoded into the following  
230 categories: “below Secondary education level” corresponding to “elementary” and “Secondary  
231 and above education level” corresponding to “high school diploma”, “college”, “university”.  
232 Youth identity was captured by asking the question: “How would you describe your identity?  
233 Select all that apply” for which there were 13 response options: “First Nations”, “Dene”,  
234 “Cree”, “Metis”, “Inuit”, “African”, “Asian”, “Canadian”, “Caribbean/West Indian”, “Eastern  
235 European”, “European”, “South Asian” or “Other (please specify)”. Response options were  
236 recoded to result in the following categories due to low count values: “Indigenous Canadians”  
237 corresponding to “First Nations”, “Dene”, “Cree”, “Metis”, “Inuit”, “Non-Indigenous  
238 Canadians” corresponding to “Canadian” and “Other” corresponding to “Caribbean/West  
239 Indian”, “Eastern European”, “European”, “South Asian” or “Other. Further gender was

240 captured by asking: “What is your gender?” which had five response options: “Male”,  
241 “Female”, “Transgender”, “Other (please specify)”, or “Prefer not to disclose”. Gender was  
242 recoded into three categories: “Female”, “Male”, or “Transgender/other (please specify)/prefer  
243 not to disclose”. Age was captured by asking citizen scientists the question “How old are you?  
244 (Age in years)”. Part-time job was captured by asking the question “do you have a part-time  
245 job?” with response options “yes” and “no”.

## 246 **Data and risk management**

247 Data were encrypted before being saved on smartphones and sent to servers when a  
248 device established a Wi-Fi connection to protect confidentiality. The app's permissions were  
249 controlled to avoid accessing any personal data on their smartphones (e.g., contact list or  
250 network sites visited). Media Access Control (MAC), which is based on a basic encryption  
251 method that is impossible to reverse, was used for anonymization, and to secure the information  
252 of citizen scientists. During the process of obtaining informed consent, risks and privacy  
253 management alternatives were clearly communicated to the citizen scientists [18].

## 254 **Data Analysis**

255 Characteristics of the youth citizen scientists were reported using descriptive statistics.  
256 Pearson correlation was used to look at the association between smartphone use reported  
257 retrospectively and prospectively on weekdays and weekends. A paired sample t-test was  
258 conducted to explore if there exists a difference in mean minutes/day of retrospective  
259 smartphone use, and mean minutes/day of prospective smartphone use reported on weekday  
260 and weekend. Further, this study investigates if there exists a difference in mean minutes of  
261 smartphone use per day retrospectively and prospectively based on gender of youth citizen

262 scientists. Multiple linear regression models were conducted to explore the contextual and  
 263 behavioural factors associated with retrospective and prospective smartphone use among youth  
 264 citizen scientists. Statistical analyses were conducted using IBM SPSS 29.0.0.0 Statistics  
 265 Software with a significance level of  $p < 0.05$ .

## 266 Results

267 A total of 808 youth citizen scientists participated in the study. However, after excluding  
 268 youth citizen scientists who did not provide complete information on key dependent and  
 269 independent variables, a total of 436 youth scientists constituted the final sample size. Around  
 270 56% of the youth citizen scientists were female, 5% identified as Indigenous and 64.1% did not  
 271 have a part-time job (**Table 1**).

272 **Table 1: Summary of characteristics of youth citizen scientists (n=436).**

| Variable                                     |                         |
|----------------------------------------------|-------------------------|
| <b>Dependent Variables</b>                   | Mean [minutes/day] (SD) |
| Overall retrospective survey smartphone use  | 250.55 (208.0)          |
| Overall Prospective EMA smartphone use       | 106.80 (173.4)          |
| Weekday retrospective survey smartphone use  | 239.20 (205.3)          |
| Weekday Prospective EMA smartphone use       | 156.21 (177.8)          |
| Weekend retrospective survey smartphone use  | 297.99 (234.1)          |
| Weekend Prospective EMA smartphone use       | 157.99 (228.6)          |
| <b>Independent Variables</b>                 |                         |
| <b>Sociodemographic variables</b>            | <b>Mean (SD)</b>        |
| Age in years                                 | 15.5 (1.6)              |
| Gender                                       | <b>Frequency (%)</b>    |
| Male                                         | 161 (38.5)              |
| Female                                       | 233 (55.7)              |
| Transgender / Other / Prefer not to disclose | 24 (5.7)                |
| Total                                        | 418 (100)               |
| Identity                                     |                         |
| Indigenous People of Canada                  | 21 (5.0)                |
| Non- Indigenous (Canadian and others)        | 396 (95)                |
| Total                                        | 417 (100)               |
| Part time Job                                |                         |
| Yes                                          | 147 (35.9)              |
| No                                           | 262 (64.1)              |
| Total                                        | 409 (100)               |

|     |                                           |            |
|-----|-------------------------------------------|------------|
| 273 | Parent Education Level                    |            |
|     | Elementary school                         | 12 (2.8)   |
|     | Secondary school and above                | 421 (97.2) |
| 274 | Total                                     | 433 (100)  |
|     | <b>School PA environment</b>              |            |
|     | Participating in sports team at school    |            |
| 275 | No                                        | 157 (37.9) |
|     | Yes                                       | 257 (62.1) |
|     | Total                                     | 414 (100)  |
| 276 | <b>Physical Activity Strength</b>         |            |
|     | Muscle training in past 7 days            |            |
|     | Less than 4 days                          | 265 (64.3) |
| 277 | 4 days or more                            | 147 (35.7) |
|     | Total                                     | 412 (100)  |
|     | <b>Social support for PA</b>              |            |
| 278 | Family members in household encourages PA |            |
|     | Discourage/neutral                        | 142 (33.4) |
|     | Encourage                                 | 283 (66.6) |
| 279 | Total                                     | 425 (100)  |
|     | Family support for PA                     |            |
|     | Unsupportive/neutral                      | 49(11.8)   |
| 280 | Supportive                                | 366(88.2)  |
|     | Total                                     | 415(100)   |
|     | Friends who are physically active         |            |
|     | Three or less                             | 47 (11.3)  |
|     | Four or more                              | 368 (88.7) |
|     | Total                                     | 415 (100)  |

281

282           There was a significant difference between overall (weekdays+weekend days) mean  
283 minutes of smartphone use/day reported retrospectively (250.55 minutes/day) and  
284 prospectively (106.80 minutes/day) (**Table 2**). Similarly, youth also reported more smartphone  
285 use on both weekdays and weekend days using retrospective surveys (239.20 minutes/day;  
286 297.99 minutes/day), compared to smartphone use reported prospectively via EMAs (156.21  
287 minutes/day; 157.99 minutes/day). This pattern continued among females, but not males (**Table**  
288 **3**). There was a significant difference between overall (weekdays+weekend days), and  
289 weekdays mean smartphone use reported retrospectively (270 minutes, 257.92 minutes) and  
290 prospectively (88.12 minutes, 138.91) among female youth citizen scientists ( $p<0.001$ ).

291 However, there was no significant difference between weekend mean smartphone use reported  
 292 retrospectively and prospectively among female citizen scientists.

293 **Table 2: Paired sample t-test result showing the differences between smartphone use**  
 294 **retrospectively and prospectively.**

| <b>Overall</b>                                     | Mean   | t-value | df | N  | p-value |
|----------------------------------------------------|--------|---------|----|----|---------|
| Minutes of smartphone use reported retrospectively | 250.55 | 6.460   | 90 | 91 | <0.001  |
| Minutes of smartphone use reported prospectively   | 106.80 |         |    |    |         |
| <b>Weekday</b>                                     |        |         |    |    |         |
| Minutes of smartphone use reported retrospectively | 239.20 | 3.087   | 55 | 56 | <0.001  |
| Minutes of smartphone use reported prospectively   | 156.21 |         |    |    |         |
| <b>Weekend</b>                                     |        |         |    |    |         |
| Minutes of smartphone use reported retrospectively | 297.99 | 4.202   | 66 | 67 | <0.001  |
| Minutes of smartphone use reported prospectively   | 157.99 |         |    |    |         |

295

296 **Table 3: Paired sample t-test result showing the differences between smartphone use**  
 297 **retrospectively and prospectively based on gender.**

| <b>Overall</b>                                  | Female |         |    |    |         | Male   |         |    |    |         |
|-------------------------------------------------|--------|---------|----|----|---------|--------|---------|----|----|---------|
|                                                 | Mean   | t-value | df | N  | p-value | Mean   | t-value | df | N  | p-value |
| Overall smartphone use reported retrospectively | 270.00 | 8.308   | 58 | 59 | <0.001  | 219.44 | 1.556   | 30 | 31 | 0.130   |
| Overall smartphone use reported prospectively   | 88.12  |         |    |    |         | 144.28 |         |    |    |         |
| <b>Weekday</b>                                  |        |         |    |    |         |        |         |    |    |         |
| Weekday smartphone use reported retrospectively | 257.92 | 3.983   | 35 | 36 | <0.001  | 212.37 | 0.319   | 18 | 19 | 0.753   |
| Weekday smartphone use reported prospectively   | 138.91 |         |    |    |         | 195.37 |         |    |    |         |
| <b>Weekend</b>                                  |        |         |    |    |         |        |         |    |    |         |
| Weekend smartphone use reported retrospectively | 318.29 | 5.865   | 40 | 41 | 0.022   | 274.20 | 0.975   | 24 | 25 | 0.339   |
| Weekend smartphone use reported prospectively   | 131.63 |         |    |    |         | 205.14 |         |    |    |         |

298

299 After controlling for demographic characteristics (age, gender, and identity), results of  
 300 the multiple linear regression models exploring social and contextual factors associated with  
 301 overall, weekday, and weekend smartphone use reported via retrospectively surveys and  
 302 prospective EMAs are portrayed in tables 4, 5, and 6, respectively. Within the overall



303 retrospective model (**Table 4 – Model 1**), youth citizen scientists who reported having a part-  
 304 time job ( $\beta=0.342$ , 95% confidence interval [CI]=0.146, 1.038, p-value = 0.010) reported more  
 305 smartphone use compared to youth citizen scientists who did not have part-time jobs. Similarly,  
 306 youth citizen scientist who reported participating in a school sports team ( $\beta=0.269$ , 95%[CI]=  
 307 0.075, 0.814, p-value=0.019) reported more smartphone use in comparison to youth who did  
 308 not participate in a school sports team. However, none of these relationships was found to be  
 309 significant in the prospective EMA model (**Table 4-Model 2**).

310 **Table 4: Linear Regression models of overall smartphone use reported retrospectively**  
 311 **vs. prospectively.**

| Variables                                                            | Retrospective (Model 1)            |                                         | Prospective (Model 2)             |                         |
|----------------------------------------------------------------------|------------------------------------|-----------------------------------------|-----------------------------------|-------------------------|
|                                                                      | Standardized Co<br>efficients Beta | (95% CI) p-<br>value                    | Standardized Co<br>efficient Beta | (95% CI) p-value        |
| (constant)                                                           |                                    | (-0.856-5.221)<br>0.156                 |                                   | (-0.402-9.789)<br>0.070 |
| <b>Sociodemographic variables</b>                                    |                                    |                                         |                                   |                         |
| Parent Education level: Below secondary school (Ref)                 |                                    |                                         |                                   |                         |
| Secondary school and above                                           | 0.175                              | (-0.063-0.678)<br>0.103                 | 0.149                             | (-0.231-1.009)<br>0.214 |
| Part-time job: Yes (Ref)                                             |                                    |                                         |                                   |                         |
| Not having a part time job                                           | 0.342                              | <b>(0.146-1.038)</b><br><b>0.010***</b> | -0.010                            | (-0.780-0.731)<br>0.948 |
| <b>Physical Activity Strength</b>                                    |                                    |                                         |                                   |                         |
| Moderate to vigorous physical<br>activity per day                    | 0.222                              | (-0.017-0.475)<br>0.068                 | 0.166                             | (-0.155-0.667)<br>0.218 |
| Muscle training: less than 4 days (Ref)                              |                                    |                                         |                                   |                         |
| Muscle Training- 4 days or<br>more                                   | 0.129                              | (-0.145-0.568)<br>0.241                 | -0.214                            | (-1.119-0.076)<br>0.086 |
| <b>School PA environment</b>                                         |                                    |                                         |                                   |                         |
| Participating in a sports team: No (Ref)                             |                                    |                                         |                                   |                         |
| Participating in a sports team                                       | 0.269                              | <b>(0.075-0.814)</b><br><b>0.019***</b> | -0.076                            | (-0.806-0.430)<br>0.546 |
| <b>Family and Friends involvement in PA</b>                          |                                    |                                         |                                   |                         |
| Family support for physical activity: Unsupportive/neutral (Ref)     |                                    |                                         |                                   |                         |
| Family support for physical<br>activity: Supportive                  | 0.221                              | (-0.021-0.976)<br>0.060                 | 0.035                             | (-0.719-0.943)<br>0.789 |
| Family encouragement for physical activity: Discourage/neutral (Ref) |                                    |                                         |                                   |                         |
| Family encouragement for<br>physical activity: Encourage             | -0.062                             | (-0.517-0.295)<br>0.586                 | -0.140                            | (-1.054-0.313)<br>0.283 |
| Number of physically active friends: Three or less (Ref)             |                                    |                                         |                                   |                         |

|                                                                                |        |                         |       |                         |
|--------------------------------------------------------------------------------|--------|-------------------------|-------|-------------------------|
| Four or more physically active friends                                         | -0.046 | (-0.444-0.299)<br>0.698 | 0.050 | (-0.509-0.743)<br>0.711 |
| *** $p < 0.05$ all regression models controlled for: age, gender, and identity |        |                         |       |                         |

312

313 In the weekday retrospective regression model (**Table 5 – Model 3**), youth who reported their  
 314 parents had attained education levels at Secondary school and above ( $\beta= 0.223$ , 95%[CI]=  
 315 0.030, 0.785,  $p$ -value=0.035) were significantly associated with more minutes of smartphone  
 316 use compared to youth whose parents had only elementary school education. Similarly, youth  
 317 who reported having family support for physical activity ( $\beta=0.246$ , 95%[CI]= 0.021, 1.037,  $p$ -  
 318 value=0.042) reported more smartphone use, compared to youth who do not have family  
 319 support for physical activity. In addition, youth who did not have a part-time job ( $\beta= 0.313$ ,  
 320 95%[CI]= 0.086, 0.995,  $p$ -value=0.020) were significantly associated with more weekday  
 321 smartphone use compared to youth who had a part-time job. These associations were not found  
 322 to be significant in the prospective model (**Table 5 – Model 4**)

323 **Table 5: Linear regression models of weekday smartphone use reported retrospectively**  
 324 **vs. prospectively.**

|                                                      | Retrospective (Model 3)           |                                         | Prospective (Model 4)            |                           |
|------------------------------------------------------|-----------------------------------|-----------------------------------------|----------------------------------|---------------------------|
|                                                      | Standardized Coefficients<br>Beta | (95% CI)<br>P-value                     | Standardized Coefficient<br>Beta | (95% CI)<br>P-value       |
| (constant)                                           |                                   | (-1.305-4.890)<br>0.252                 |                                  | (-1.588-<br>10.778) 0.140 |
| <b>Sociodemographic variables</b>                    |                                   |                                         |                                  |                           |
| Parent Education level: Below secondary school (Ref) |                                   |                                         |                                  |                           |
| Secondary school and above                           | 0.233                             | <b>(0.030-0.785)</b><br><b>0.035***</b> | 0.135                            | (-0.398-<br>0.983) 0.396  |
| Part-time job: Yes (Ref)                             |                                   |                                         |                                  |                           |
| Not having a part time job                           | 0.313                             | <b>(0.086-0.995)</b><br><b>0.020***</b> | 0.150                            | (-0.490-<br>1.111) 0.437  |
| <b>Physical Activity Strength</b>                    |                                   |                                         |                                  |                           |
| Moderate to vigorous physical activity per day       | 0.158                             | (-0.088-0.414)<br>0.200                 | 0.218                            | (-0.209-<br>0.805) 0.241  |
| Muscle training: less than 4 days (Ref)              |                                   |                                         |                                  |                           |

|                                                                                |        |                                         |        |                      |
|--------------------------------------------------------------------------------|--------|-----------------------------------------|--------|----------------------|
| Muscle Training- 4 days or more                                                | 0.150  | (-0.118-0.609)<br>0.182                 | -0.204 | (-1.176-0.307) 0.242 |
| <b>School PA environment</b>                                                   |        |                                         |        |                      |
| Participating in a sports team: No (Ref)                                       |        |                                         |        |                      |
| Participating in a sports team                                                 | 0.197  | (-0.053-0.701)<br>0.090                 | -0.044 | (-0.804-0.622) 0.798 |
| <b>Family and friends' involvement in PA</b>                                   |        |                                         |        |                      |
| Family support for physical activity: Unsupportive/neutral (Ref)               |        |                                         |        |                      |
| Family support for physical activity: Supportive                               | 0.246  | <b>(0.021-1.037)</b><br><b>0.042***</b> | -0.025 | (-1.082-0.933) 0.882 |
| Family encouragement for physical activity: Discourage/neutral (Ref)           |        |                                         |        |                      |
| Family encouragement for physical activity: encourage                          | -0.073 | (-0.543-0.285)<br>0.535                 | -0.187 | (-1.306-0.431) 0.314 |
| Number of physically active friends: Three or less (Ref)                       |        |                                         |        |                      |
| Four or more physically active friends                                         | -0.088 | (-0.516-0.240)<br>0.469                 | -0.039 | (-0.867-0.702) 0.832 |
| *** $p < 0.05$ all regression models controlled for: age, gender, and identity |        |                                         |        |                      |

325

326 In the weekend retrospective model (**Table 6 - Model 5**), youth citizen scientists who did not  
 327 have a part-time job ( $\beta=0.333$ , 95%[CI]= 0.133, 1.182, p-value=0.015) reported significantly  
 328 greater smartphone use in comparison with had a part-time job. Similarly, youth who reported  
 329 participating in a school sports team was found to be associated with more smartphone use  
 330 ( $\beta=0.261$ , 95%[CI]= 0.057, 0.927, p-value=0.027) as compared to youth who did not report  
 331 participating in school sports team. However, these significant associations were not found in  
 332 the prospective EMA model (**Table 6 – Model 6**).

333 **Table 6: Linear regression models of weekends smartphone use reported retrospectively**  
 334 **vs. prospectively.**

|                                                      | <b>Retrospective (Model 5)</b> |                      | <b>Prospective (Model 6)</b>   |                       |
|------------------------------------------------------|--------------------------------|----------------------|--------------------------------|-----------------------|
|                                                      | Standardized Coefficients Beta | (95% CI) p-value     | Standardized Co efficient Beta | (95% CI) p-value      |
| (constant)                                           |                                | (-2.463-4.686) 0.537 |                                | (-2.055-10.685) 0.180 |
| <b>Sociodemographic variables</b>                    |                                |                      |                                |                       |
| Parent Education level: Below secondary school (Ref) |                                |                      |                                |                       |
| Secondary school and above                           | 0.122                          | (-0.192-0.680) 0.268 | 0.147                          | (-0.328-1.050) 0.298  |

|                                                                                |        |                                         |        |                         |
|--------------------------------------------------------------------------------|--------|-----------------------------------------|--------|-------------------------|
| Part-time job: Yes (Ref)                                                       |        |                                         |        |                         |
| Not having a part time job                                                     | 0.333  | <b>(0.133-1.182)</b><br><b>0.015***</b> | -0.115 | (-1.197-0.604)<br>0.511 |
| <b>Physical Activity Strength</b>                                              |        |                                         |        |                         |
| Moderate to vigorous physical activity per day                                 | 0.220  | (-0.030-0.550) 0.078                    | 0.209  | (-0.151-0.711)<br>0.197 |
| Muscle training: less than 4 days (Ref)                                        |        |                                         |        |                         |
| Muscle Training- 4 days or more                                                | 0.099  | (-0.235-0.605) 0.382                    | -0.156 | (-1.034-0.330)<br>0.304 |
| <b>School PA environment</b>                                                   |        |                                         |        |                         |
| Participating in a sports team: No (Ref)                                       |        |                                         |        |                         |
| Participating in a sports team                                                 | 0.261  | <b>(0.057-0.927)</b><br><b>0.027***</b> | -0.088 | (-0.870-0.466)<br>0.547 |
| <b>Family and Friends involvement in PA</b>                                    |        |                                         |        |                         |
| Family support for physical activity: Unsupportive/neutral (Ref)               |        |                                         |        |                         |
| Family support for physical activity: Supportive                               | 0.166  | (-0.177-0.996) 0.168                    | 0.025  | (-0.852-0.989)<br>0.881 |
| Family encouragement for physical activity: Discourage/neutral (Ref)           |        |                                         |        |                         |
| Family encouragement for physical activity: encourage                          | -0.043 | (-0.566-0.389) 0.713                    | -0.116 | (-0.973-0.424)<br>0.433 |
| Number of physically active friends: Three or less (Ref)                       |        |                                         |        |                         |
| Four or more physically active friends                                         | 0.015  | (-0.410-0.463) 0.904                    | -0.061 | (-0.830-0.570)<br>0.711 |
| *** $p < 0.05$ all regression models controlled for: age, gender, and identity |        |                                         |        |                         |

## 335 Discussion

336 The objective of this study was to compare smartphone use reported via retrospective  
337 surveys and prospective EMAs by engaging with youth citizen scientists via their own  
338 smartphones. The study also investigated the behavioural, and contextual factors that are  
339 associated with smartphone use reported via retrospective surveys and prospective EMAs. The  
340 primary findings of this study show that there is a significant difference in smartphone use  
341 reported retrospectively (via validated surveys) and prospectively (via EMAs). While evidence  
342 generally indicates that retrospective data collection is prone to bias irrespective of over- or  
343 under-estimation [19–21], to our knowledge, no research has been carried out to compare  
344 retrospective recall surveys and prospective EMAs to assess smartphone use within the same  
345 cohort of participants.

346 While there is some evidence of over-estimation of sedentary behaviours when  
347 reporting retrospectively [19], and discrepancies between reporting smartphone use between  
348 males and females [22], our study is the first digital epidemiological investigation that  
349 compared smartphone use reporting retrospectively and prospectively among the same cohort  
350 of youth. There is some evidence that individuals who are more socially engaged might over-  
351 estimate their smartphone use, while individuals who under-estimate their smartphone use may  
352 have lost track of time [20]. In general, evidence indicates that prospective measurement of  
353 behaviours using EMAs is more accurate due to less susceptibility to recall bias [17,23].

354 Although the World Health Organization guidelines indicate that youth aged 15-18  
355 should not spend more than two hours of screentime per day [24], current evidence indicates  
356 that youth across the world spend significantly more time than two hours/day on screens  
357 [25,26]. The uncontrolled screentime has detrimental effects on both physical and mental health  
358 leading to increased risk of non-communicable chronic diseases such as obesity, diabetes, heart  
359 diseases, reduced sleep quality as well as stress, anxiety, and depression [27]. More  
360 importantly, the screentime guidelines do not specify the time that youth should spend on  
361 mobile devices, particularly smartphones, which most youth have access to in this digital age  
362 [28,29]. This gap in guidelines needs to be addressed, particularly because smartphones are the  
363 primary devices of day-to-day functioning, yet ironically excessive smartphone use is also  
364 associated with poor youth health outcomes [4,14,30]

365 However, to understand associations between smartphone use and youth health  
366 outcomes, it is imperative to obtain valid and reliable data, which, again ironically is possible  
367 via smartphones themselves due to their near universal usage among youth [4,31]. This study  
368 utilized the Smart platform [18], a digital citizen science platform that engaged youth as citizen

369 scientists to obtain both retrospective and prospective smartphone use via their own  
370 smartphones [6].

371 This approach also enabled our team to obtain relevant data on behavioral, contextual,  
372 and demographic factors to investigate the association of these variables with both retrospective  
373 and prospective smartphone use among youth. Moreover, as evidence indicates that  
374 smartphone use and screentime in general varies between weekdays and weekend days [4,30]  
375 this study explored the association of behavioural and contextual factors with overall  
376 (weekday+weekend day) youth smartphone use, as well as weekday and weekend day  
377 smartphone use reported by both retrospective surveys and prospective EMAs.

378 One consistent finding was that there were no significant associations between socio-  
379 demographic and contextual factors with overall, weekday, and weekend day smartphone use  
380 reported via EMAs.

381 However, retrospective models showed some common associations between  
382 sociodemographic and contextual factors with overall, weekday and weekend day smartphone  
383 use. Youth who reported that they did not have a part-time job also reported significantly more  
384 overall, and weekend day smartphone use in comparison with youth who had a part-time job -  
385 a finding that is consistent with some existing evidence [33], and potentially an indication that  
386 youth, due to the nature of part-time work they do, do not have access to smartphones  
387 consistently.

388 Interestingly, youth who participated in sports teams also reported greater overall and  
389 weekend day smartphone use. This finding contradicts existing evidence that shows lower  
390 smartphone use among students that participate in school sports teams [34]. However, some  
391 studies also report increased social media engagement among students during school sporting

392 events, which may explain increased smartphone use association with participation in school  
393 sports teams [35].

394 The findings of this study also showed that youth whose parents had at least secondary  
395 school education reported higher smartphone use on weekdays, another contradictory finding  
396 because current evidence indicates that higher parental education is associated with lower  
397 smartphone use among children and youth [36]. Likewise, youth who reported family support  
398 for physical activity also reported higher smartphone use, another unexpected association that  
399 could potentially be attributed to social desirability bias, where individuals report more support  
400 for physical activity [37].

401 Irrespective of the direction of association of contextual and sociodemographic  
402 variables, there are some important aspects that need to be highlighted in understanding  
403 smartphone use in general, and in particular among youth. First, all significant findings were  
404 depicted in the retrospective smartphone use reporting models, and no significant findings were  
405 depicted in the prospective smartphone use reporting (EMAs). This in itself is a major finding  
406 that emphasizes the rationale for conducting this study – it is critical that more accurate  
407 measures of reporting be standardized to understand smartphone use because retrospective self-  
408 reporting data collection tools are prone to bias and misclassification [14,32,38].

409 Second, it is imperative to appreciate the complexity of smartphone use, which includes  
410 various behaviours and motivations, such as social media use, gaming, and texting, among  
411 others, which have varying associations with health outcomes [40–43]. To capture these  
412 effectively and accurately, it is critical to move towards prospective measures such as EMAs  
413 that minimize recall bias, particularly when the reporting is complicated by the range of  
414 behaviours [44]. Objective measures provide accurate overall smartphone use estimates [6],

415 however, to capture the variation of smartphone use ethically, while preserving privacy can be  
416 challenging [45]. Finally, the contextual and sociodemographic associations of smartphone use  
417 also have to be captured prospectively to minimize bias, while again, appreciating the  
418 complexity of smartphone access itself [11]. For instance, youth from affluent households with  
419 more educated parents might have easier and earlier access to smartphones, which could in  
420 itself contradict accepted patterns that associate higher socioeconomic status with more positive  
421 health behaviours and outcomes [46,47].

422         Perhaps more importantly, the approaches we use to capture digital data ethically from  
423 citizens need to be revisited. In scientific research settings, power often lies with those who  
424 have knowledge such as researchers, which has been an obstacle for meaningful data  
425 collection, particularly if the data are sensitive and need to be obtained via citizen devices [48].  
426 Digital citizen science is an approach that can democratize science through engagement with  
427 citizens ethically and directly to obtain prospective big data [49,50]– an approach that was  
428 utilized in collected data from youth in this study via their own smartphones [6,51].

429         Appropriate measurement of smartphone use among youth is critical to not only inform  
430 potential smartphone use recommendations [14], but also to determine appropriate use for  
431 digital health interventions [15] that have the potential to address mental health illnesses at  
432 reduced cost and improve access to resources [31], a measurement that could potentially be  
433 improved via digital citizen science approaches [14,18].

## 434 **Strengths and limitations**

435         No studies have compared smartphone use among youth using validated retrospective  
436 traditional surveys and prospective EMAs. The strengths of this study include utilizing citizen  
437 science approaches, where youth used their own devices to engage with the researchers. The



438 key limitation is that the smartphone use reported in this study does not delineate between the  
439 different types of smartphone use informed by varied motivations – social media, texting,  
440 gaming, among others. Another limitation is that data were collected during one season even  
441 though there is evidence that screentime and sedentary behaviours are influenced by changes  
442 in weather [56,57]. Future studies should not only measure different types of smartphone use,  
443 but also aim to capture objective data to improve accuracy of reporting, while taking seasonality  
444 into consideration [58].

## 445 **Conclusion**

446 The findings of this study have implications for appropriately understanding and  
447 monitoring smartphone use in the digital age among youth. EMAs can potentially minimize  
448 recall bias of smartphone use among youth, and other behaviours. More importantly, digital  
449 citizen science approaches that engage large populations of youth using their own smartphones  
450 can transform how we ethically monitor and mitigate the impact of excessive smartphone use.

451

## 453 **References**

- 454 1. Ratan ZA, Parrish A-M, Alotaibi MS, Hosseinzadeh H. Prevalence of Smartphone  
455 Addiction and Its Association with Sociodemographic, Physical and Mental Well-Being: A  
456 Cross-Sectional Study among the Young Adults of Bangladesh. *Int J Environ Res Public*  
457 *Health*. 2022;19:16583.
- 458 2. LeBlanc AG, Gunnell KE, Prince SA, Saunders TJ, Barnes JD, Chaput J-P. The Ubiquity  
459 of the Screen: An Overview of the Risks and Benefits of Screen Time in Our Modern World.  
460 *Translational Journal of the American College of Sports Medicine*. 2017;2:104.
- 461 3. Ryding FC, Kuss DJ. Passive objective measures in the assessment of problematic  
462 smartphone use: A systematic review. *Addictive Behaviors Reports*. 2020;11:100257.
- 463 4. Brodersen K, Hammami N, Katapally TR. Is excessive smartphone use associated with  
464 weight status and self-rated health among youth? A smart platform study. *BMC Public*  
465 *Health*. 2023;23:234.
- 466 5. Hale L, Guan S. Screen time and sleep among school-aged children and adolescents: a  
467 systematic literature review. *Sleep Med Rev*. 2015;21:50–8.
- 468 6. Katapally TR, Hammami N, Chu LM. A randomized community trial to advance digital  
469 epidemiological and mHealth citizen scientist compliance: A smart platform study. *PLOS*  
470 *ONE*. 2021;16:e0259486.
- 471 7. Dunton GF. Ecological Momentary Assessment in Physical Activity Research. *Exercise*  
472 *and Sport Sciences Reviews*. 2017;45:48.
- 473 8. Russell MA, Gajos JM. Annual Research Review: Ecological momentary assessment  
474 studies in child psychology and psychiatry. *J Child Psychol Psychiatry*. 2020;61:376–94.
- 475 9. Perski O, Keller J, Kale D, Asare BY-A, Schneider V, Powell D, et al. Understanding  
476 health behaviours in context: A systematic review and meta-analysis of ecological momentary  
477 assessment studies of five key health behaviours. *Health Psychol Rev*. 16:576–601.
- 478 10. Asselbergs J, Ruwaard J, Ejdys M, Schrader N, Sijbrandij M, Riper H. Mobile Phone-  
479 Based Unobtrusive Ecological Momentary Assessment of Day-to-Day Mood: An Explorative  
480 Study. *Journal of Medical Internet Research*. 2016;18:e5505.
- 481 11. Romanzini CLP, Romanzini M, Batista MB, Barbosa CCL, Shigaki GB, Dunton G, et al.  
482 Methodology Used in Ecological Momentary Assessment Studies About Sedentary Behavior  
483 in Children, Adolescents, and Adults: Systematic Review Using the Checklist for Reporting  
484 Ecological Momentary Assessment Studies. *Journal of Medical Internet Research*.  
485 2019;21:e11967.

- 486 12. Katapally TR, Chu LM. Digital epidemiological and citizen science methodology to  
487 capture prospective physical activity in free-living conditions: a SMART Platform study.  
488 *BMJ Open*. 2020;10:e036787.
- 489 13. Atkin AJ, Sharp SJ, Corder K, van Sluijs EMF. Prevalence and Correlates of Screen Time  
490 in Youth: An International Perspective. *American Journal of Preventive Medicine*.  
491 2014;47:803–7.
- 492 14. Brodersen K, Hammami N, Katapally TR. Smartphone Use and Mental Health among  
493 Youth: It Is Time to Develop Smartphone-Specific Screen Time Guidelines. *Youth*.  
494 2022;2:23–38.
- 495 15. Katapally TR. Smart Indigenous Youth: The Smart Platform Policy Solution for Systems  
496 Integration to Address Indigenous Youth Mental Health. *JMIR Pediatrics and Parenting*.  
497 2020;3:e21155.
- 498 16. Katapally TR. The SMART Framework: Integration of Citizen Science, Community-  
499 Based Participatory Research, and Systems Science for Population Health Science in the  
500 Digital Age. *JMIR mHealth and uHealth*. 2019;7:e14056.
- 501 17. Ibrahim ST, Hammami N, Katapally TR. Traditional surveys versus ecological  
502 momentary assessments: digital citizen science approaches to improve ethical physical  
503 activity surveillance among youth [Internet]. *medRxiv*; 2023 [cited 2023 Aug 7]. p.  
504 2023.06.06.23291067. Available from:  
505 <https://www.medrxiv.org/content/10.1101/2023.06.06.23291067v1>
- 506 18. Katapally TR, Bhawra J, Leatherdale ST, Ferguson L, Longo J, Rainham D, et al. The  
507 SMART Study, a Mobile Health and Citizen Science Methodological Platform for Active  
508 Living Surveillance, Integrated Knowledge Translation, and Policy Interventions:  
509 Longitudinal Study. *JMIR Public Health and Surveillance*. 2018;4:e8953.
- 510 19. Andorko ND, Rakhshan-Rouhakhtar P, Hinkle C, Mittal VA, McAllister M, DeVlyder J,  
511 et al. Assessing validity of retrospective recall of physical activity in individuals with  
512 psychosis-like experiences. *Psychiatry Research*. 2019;273:211–7.
- 513 20. Hodes LN, Thomas KGF. Smartphone Screen Time: Inaccuracy of self-reports and  
514 influence of psychological and contextual factors. *Computers in Human Behavior*.  
515 2021;115:106616.
- 516 21. Wang X, Li Y, Fan H. The associations between screen time-based sedentary behavior  
517 and depression: a systematic review and meta-analysis. *BMC Public Health*. 2019;19:1524.
- 518 22. Andone I, Błaszkiwicz K, Eibes M, Trendafilov B, Montag C, Markowitz A. How age  
519 and gender affect smartphone usage. *Proceedings of the 2016 ACM International Joint*  
520 *Conference on Pervasive and Ubiquitous Computing: Adjunct* [Internet]. New York, NY,  
521 USA: Association for Computing Machinery; 2016 [cited 2023 Sep 11]. p. 9–12. Available  
522 from: <https://dl.acm.org/doi/10.1145/2968219.2971451>

- 523 23. Degroote L, DeSmet A, De Bourdeaudhuij I, Van Dyck D, Crombez G. Content validity  
524 and methodological considerations in ecological momentary assessment studies on physical  
525 activity and sedentary behaviour: a systematic review. *International Journal of Behavioral*  
526 *Nutrition and Physical Activity*. 2020;17:35.
- 527 24. Chaput J-P, Willumsen J, Bull F, Chou R, Ekelund U, Firth J, et al. 2020 WHO guidelines  
528 on physical activity and sedentary behaviour for children and adolescents aged 5–17 years:  
529 summary of the evidence. *Int J Behav Nutr Phys Act*. 2020;17:141.
- 530 25. Alosaimi FD, Alyahya H, Alshahwan H, Mahyijari NA, Shaik SA. Smartphone addiction  
531 among university students in Riyadh, Saudi Arabia. *Saudi Med J*. 2016;37:675–83.
- 532 26. Kelly S, Stephens J, Hoying J, McGovern C, Melnyk BM, Militello L. A systematic  
533 review of mediators of physical activity, nutrition, and screen time in adolescents:  
534 Implications for future research and clinical practice. *Nursing Outlook*. 2017;65:530–48.
- 535 27. Stiglic N, Viner RM. Effects of screentime on the health and well-being of children and  
536 adolescents: a systematic review of reviews. *BMJ Open*. 2019;9:e023191.
- 537 28. Bull FC, Al-Ansari SS, Biddle S, Borodulin K, Buman MP, Cardon G, et al. World  
538 Health Organization 2020 guidelines on physical activity and sedentary behaviour. *Br J*  
539 *Sports Med*. 2020;54:1451–62.
- 540 29. Sampasa-Kanyinga H, Colman I, Goldfield GS, Janssen I, Wang J, Podinic I, et al.  
541 Combinations of physical activity, sedentary time, and sleep duration and their associations  
542 with depressive symptoms and other mental health problems in children and adolescents: a  
543 systematic review. *The International Journal of Behavioral Nutrition and Physical Activity*  
544 [Internet]. 2020 [cited 2023 Nov 29];17. Available from:  
545 [https://journals.scholarsportal.info/details/14795868/v17inone/nfp\\_copastcaaasr.xml](https://journals.scholarsportal.info/details/14795868/v17inone/nfp_copastcaaasr.xml)
- 546 30. Tang S, Werner-Seidler A, Torok M, Mackinnon AJ, Christensen H. The relationship  
547 between screen time and mental health in young people: A systematic review of longitudinal  
548 studies. *Clinical Psychology Review*. 2021;86:102021.
- 549 31. Liverpool S, Mota CP, Sales CMD, Čuš A, Carletto S, Hancheva C, et al. Engaging  
550 Children and Young People in Digital Mental Health Interventions: Systematic Review of  
551 Modes of Delivery, Facilitators, and Barriers. *J Med Internet Res*. 2020;22:e16317.
- 552 32. Katapally TR, Chu LM. Methodology to Derive Objective Screen-State from  
553 Smartphones: A SMART Platform Study. *International Journal of Environmental Research*  
554 *and Public Health*. 2019;16:2275.
- 555 33. Kalenkoski CM, Pabilonia SW. Time to Work or Time to Play: The Effect of Student  
556 Employment on Homework, Sleep, and Screen Time [Internet]. Rochester, NY; 2010 [cited  
557 2023 Sep 12]. Available from: <https://papers.ssrn.com/abstract=1530670>
- 558 34. Tükel Y. Investigation of the Relationship between Smartphone Addiction and Leisure  
559 Satisfaction of University Students. *IJTES*. 2020;4:218–26.

- 560 35. Kim Y, Wang Y, Oh J. Digital Media Use and Social Engagement: How Social Media  
561 and Smartphone Use Influence Social Activities of College Students. *Cyberpsychology,*  
562 *Behavior, and Social Networking.* 2016;19:264–9.
- 563 36. Pons M, Bennasar-Veny M, Yañez AM. Maternal Education Level and Excessive  
564 Recreational Screen Time in Children: A Mediation Analysis. *International Journal of*  
565 *Environmental Research and Public Health.* 2020;17:8930.
- 566 37. Adams SA, Matthews CE, Ebbeling CB, Moore CG, Cunningham JE, Fulton J, et al. The  
567 Effect of Social Desirability and Social Approval on Self-Reports of Physical Activity.  
568 *American Journal of Epidemiology.* 2005;161:389–98.
- 569 38. Katapally T. It is time to integrate citizen science, community- based participatory  
570 research, and systems science through ubiquitous digital tools to inform active, healthy  
571 planetary policies.
- 572 39. Lee PH, Macfarlane DJ, Lam T, Stewart SM. Validity of the international physical  
573 activity questionnaire short form (IPAQ-SF): A systematic review. *International Journal of*  
574 *Behavioral Nutrition and Physical Activity.* 2011;8:115.
- 575 40. Paulus FW, Ohmann S, von Gontard A, Popow C. Internet gaming disorder in children  
576 and adolescents: a systematic review. *Developmental Medicine & Child Neurology.*  
577 2018;60:645–59.
- 578 41. Kuss DJ, Griffiths MD. Internet gaming addiction: A systematic review of empirical  
579 research. *International Journal of Mental Health and Addiction.* 2012;10:278–96.
- 580 42. Hussain Z, Griffiths MD. Problematic Social Networking Site Use and Comorbid  
581 Psychiatric Disorders: A Systematic Review of Recent Large-Scale Studies. *Frontiers in*  
582 *Psychiatry [Internet].* 2018 [cited 2023 Dec 19];9. Available from:  
583 [https://journals.scholarsportal.info/details/16640640/v9inone/nfp\\_psnuasrorls.xml](https://journals.scholarsportal.info/details/16640640/v9inone/nfp_psnuasrorls.xml)
- 584 43. Katapally TR, Laxer RE, Qian W, Leatherdale ST. Do school physical activity policies  
585 and programs have a role in decreasing multiple screen time behaviours among youth?  
586 *Preventive Medicine.* 2018;110:106–13.
- 587 44. Katapally TR, Audur Sjöfn T, Rachel L, Wei Q, Scott T. L. Original quantitative research  
588 The association of school connectedness and bullying involvement with multiple screen-time  
589 behaviours among youth in two Canadian provinces: a COMPASS study. *Health Promot*  
590 *Chronic Dis Prev Can.* 2018;38:368–79.
- 591 45. Lustgarten SD, Garrison YL, Sinnard MT, Flynn AW. Digital privacy in mental  
592 healthcare: current issues and recommendations for technology use. *Current Opinion in*  
593 *Psychology.* 2020;36:25–31.
- 594 46. Marttila-Tornio K, Männikkö N, Ruotsalainen H, Miettunen J, Kääriäinen M. Lower  
595 parental socioeconomic status in childhood and adolescence predicts unhealthy health

- 596 behaviour patterns in adolescence in Northern Finland. *Scandinavian Journal of Caring*  
597 *Sciences*. 2021;35:742–52.
- 598 47. Curtis ME, Clingan SE, Guo H, Zhu Y, Mooney LJ, Hser Y-I. Disparities in digital access  
599 among American rural and urban households and implications for telemedicine-based  
600 services. *The Journal of Rural Health*. 2022;38:512–8.
- 601 48. Groot B, Abma T. Ethics framework for citizen science and public and patient  
602 participation in research. *BMC Medical Ethics*. 2022;23:23.
- 603 49. Kullenberg C, Kasperowski D. What Is Citizen Science? – A Scientometric Meta-  
604 Analysis. *PLOS ONE*. 2016;11:e0147152.
- 605 50. Tauginienė L, Butkevičienė E, Vohland K, Heinisch B, Daskolia M, Suškevičs M, et al.  
606 Citizen science in the social sciences and humanities: the power of interdisciplinarity.  
607 *Palgrave Commun*. 2020;6:1–11.
- 608 51. Rosas LG, Rodriguez Espinosa P, Montes Jimenez F, King AC. The Role of Citizen  
609 Science in Promoting Health Equity. *Annual Review of Public Health*. 2022;43:215–34.
- 610 52. Uhlhaas P, Torous J. Digital tools for youth mental health. *npj Digit Med*. 2019;2:1–3.
- 611 53. Walker S, Kannan P, Bhawra J, Foulds H, Katapally TR. The Impact of Culture, Identity  
612 and Intergenerational Connections on Indigenous Youth Mental Health: Qualitative Findings  
613 from a Longitudinal Digital Health Community Trial [Internet]. 2021 [cited 2023 Sep 12].  
614 Available from: <https://doi.org/10.21203/rs.3.rs-956256/v1>
- 615 54. Tan Y-R, Agrawal A, Matsoso MP, Katz R, Davis SLM, Winkler AS, et al. A call for  
616 citizen science in pandemic preparedness and response: beyond data collection. *BMJ Glob*  
617 *Health*. 2022;7:e009389.
- 618 55. Nations U. Capacity-Building [Internet]. United Nations. United Nations; [cited 2023 Sep  
619 12]. Available from: <https://www.un.org/en/academic-impact/capacity-building>
- 620 56. Katapally TR, Rainham D, Muhajarine N. The Influence of Weather Variation, Urban  
621 Design and Built Environment on Objectively Measured Sedentary Behaviour in Children.  
622 *AIMS Public Health*. 2016;3:663–81.
- 623 57. Zheng C, Feng J, Huang W, Wong SH-S. Associations between weather conditions and  
624 physical activity and sedentary time in children and adolescents: A systematic review and  
625 meta-analysis. *Health & Place*. 2021;69:102546.
- 626 58. Katapally TR, Rainham D, Muhajarine N. A methodology to leverage cross-sectional  
627 accelerometry to capture weather’s influence in active living research. *Can J Public Health*.  
628 2016;107:e30–6.
- 629
